# Supplementary material for: Gene fitness landscape of group A streptococcus during necrotizing myositis
Source: JCI journal article supplement (doi:10.1172/jci124994), 2019-01-21
Supplement: sd1 [file 1]

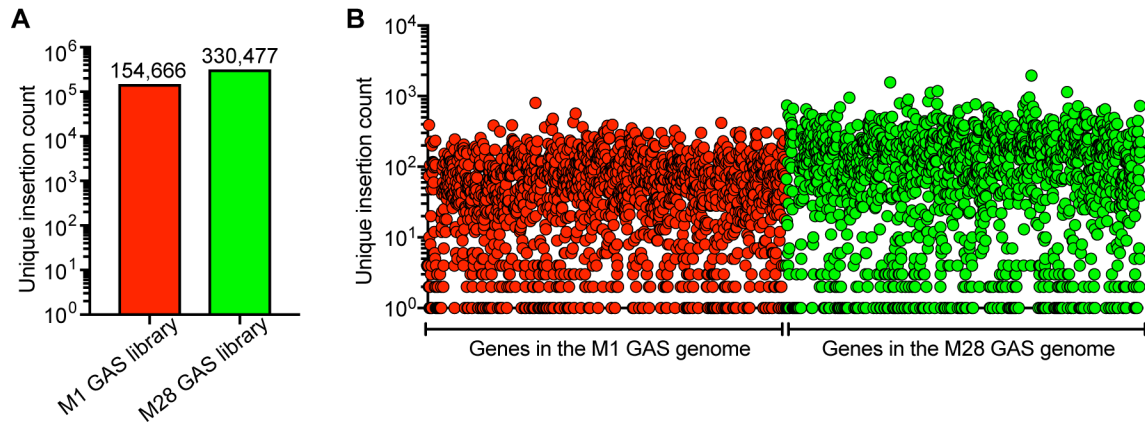

Figure S1. Characterization of the serotype M1 and M28 transposon mutant libraries. (A) Overall unique transposon insertion count of the serotype M1 (red) and M28 (green) mutant libraries. (B) Unique transposon insertion count of each gene in the serotype M1 (red circle) and M28 (green circle) genomes.

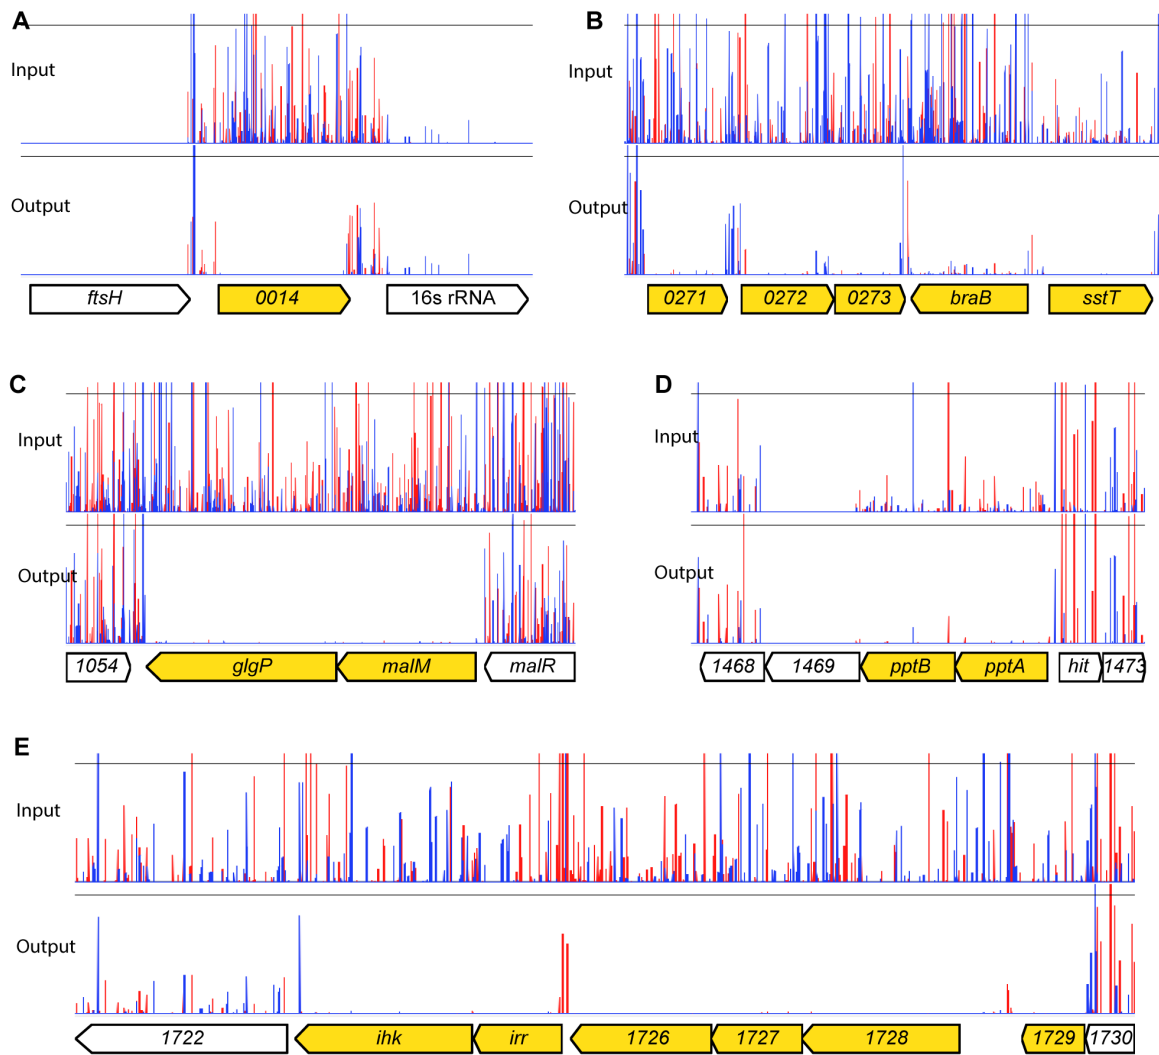

Figure S2. Representative insertion maps of M1 GAS mutant pools before and post NHP infection. Genes identified as required for GAS fitness during NHP infection are highlighted. The locus tag numbers refer to the annotation for serotype M1 GAS strain MGAS5005.
